# Supplementary material
Source: MDPI journal article supplement (https://www.mdpi.com/2073-445X/12/2/439)
Supplement: s1 [file s1]

# Assessment of Soil Potentially Toxic Metal Pollution in Kolchugino Town, Russia: Characteristics and Pollution

## Quality control

The quality control of the measured elements was weighted using certified reference soil sample (Sod-podzolic sandy soil sample governmental standard sample GSO 2498-83). The absolute relative difference between the standard and measured mass fractions is up to 22%. The results of the standard and measured mass fractions are tabulated in Table S1.

**Table S1.** the standard mass fraction of the standard and the measured (mg/kg).

| Elements | Standard mass fraction mg/kg | Measured mass fraction mg/kg |
|----------|------------------------------|------------------------------|
| Cu       | 9±4                          | 11±0.8                       |
| Pb       | 8±1                          | 8.5±0.6                      |
| Zn       | 10±2                         | 12.2±0.8                     |
| Cd       | 0.10±0.03                    | 0.080±0.006                  |

## Risk index RI

The interpretation categories are given as follows;  $RI < 150$  - low potential ecological risk;  $150 \leq RI < 300$  - moderate potential ecological risk;  $300 \leq RI < 600$  - considerable potential ecological risk;  $RI \geq 600$  high potential ecological risk.

**Table S2.** Details on the pollution indices and the corresponding areas analyzed by LULC

| ID | Lat    | Long   | PLI | TPI | RI   | LULC       |
|----|--------|--------|-----|-----|------|------------|
| 1  | 56.317 | 39.361 | 110 | 107 | 528  | Urban      |
| 2  | 56.318 | 39.374 | 89  | 86  | 452  | Green      |
| 3  | 56.317 | 39.386 | 50  | 47  | 264  | Urban      |
| 4  | 56.311 | 39.361 | 59  | 56  | 268  | Urban      |
| 5  | 56.313 | 39.376 | 93  | 90  | 467  | Urban      |
| 6  | 56.312 | 39.385 | 109 | 106 | 607  | Urban      |
| 7  | 56.306 | 39.348 | 118 | 115 | 381  | Industrial |
| 8  | 56.305 | 39.361 | 75  | 72  | 401  | Urban      |
| 9  | 56.304 | 39.374 | 94  | 91  | 510  | Industrial |
| 10 | 56.306 | 39.402 | 156 | 153 | 643  | Industrial |
| 11 | 56.298 | 39.333 | 186 | 183 | 922  | Green      |
| 12 | 56.297 | 39.348 | 84  | 81  | 317  | Urban      |
| 13 | 56.297 | 39.362 | 263 | 260 | 1013 | Urban      |
| 14 | 56.299 | 39.374 | 911 | 908 | 4519 | Industrial |

|    |        |        |     |     |      |            |
|----|--------|--------|-----|-----|------|------------|
| 15 | 56.297 | 39.387 | 595 | 592 | 2953 | Industrial |
| 16 | 56.299 | 39.399 | 982 | 979 | 4686 | Industrial |
| 17 | 56.292 | 39.344 | 177 | 174 | 594  | Urban      |
| 18 | 56.297 | 39.387 | 183 | 180 | 890  | Industrial |
| 19 | 56.292 | 39.374 | 116 | 113 | 427  | Urban      |
| 20 | 56.293 | 39.387 | 660 | 657 | 3396 | Industrial |
| 21 | 56.284 | 39.348 | 222 | 219 | 913  | Green      |
| 22 | 56.284 | 39.359 | 183 | 180 | 696  | Green      |
| 23 | 56.285 | 39.375 | 375 | 372 | 1840 | Industrial |
| 24 | 56.289 | 39.403 | 269 | 266 | 1217 | Urban      |

---
